# Supplementary material
Source: publisher figshare collection journal article supplement (https://brill.figshare.com/ndownloader/files/35932742)
Supplement: Supplementary file 1 [file 35932742]

# **Is Self-Related Cognition Resistant to Time-Based Expectancy?**

**Marina Kunchulia<sup>1,\*</sup> and Roland Thomaschke<sup>2</sup>**

<sup>1</sup> Institute of Cognitive Neurosciences, Free University of Tbilisi, Tbilisi, 0159, Georgia

<sup>2</sup> Time, Interaction, and Self-Determination Group, Cognition, Action and Sustainability Unit, Department of Psychology, University of Freiburg, 79085 Freiburg, Germany

\*Corresponding author; e-mail: m.kunchulia@freeuni.edu.ge

ORCID iD: Kunchulia: 0000-0003-3959-7265

## **Supplementary material**

### **Correlational Analysis**

#### *Experiment 1*

A Pearson correlation test did not show any significant correlations between the score of the Rosenberg self-esteem scale and the magnitude of the time-based expectancy effect,  $r_{28} = 0.113$ ,  $p = 0.55$ , or between the score of the Rosenberg self-esteem scale and the magnitude of the time-based expectancy effect in the self-task,  $r_{28} = 0.056$ ,  $p = 0.769$ . No correlation was observed between the score of the Rosenberg self-esteem scale and the difference between the magnitude of the time-based expectancy effect in the self-task and the magnitude of the time-based expectancy effect in the neutral task,  $r_{28} = 0.002$ ,  $p = 0.993$ . The magnitude of the time-based expectancy effect was

calculated per participant as the difference between the mean response time (RT) for frequent time–event combinations and the mean RT or infrequent time–event combinations.

The correlations were also non-significant for the score on the Difficulties in Emotion Regulation scale and the overall magnitude of the time-based expectancy effect,  $r_{28} = 0.072$ ,  $p = 0.7$ , and with magnitude of the time-based expectancy effect in the self-task,  $r_{28} = 0.224$ ,  $p = 0.233$ ; and for the difference between the magnitude of the time-based expectancy effect in the self-task with the magnitude of the time-based expectancy effect in the neutral task,  $r_{28} = 0.143$ ,  $p = 0.45$ .
